# Supplementary material
Source: PubMed Central journal article supplement (PMC10602486)
Supplement: NIHPP2023.05.05.23289524v2-supplement-1.pdf [file NIHPP2023.05.05.23289524v2-supplement-1.pdf]

# DeepPhe-CR: Natural Language Processing Software Services for Cancer Registrar Patient Abstraction

## Supplemental Appendix: Examples of DeepPhe-CR calls and results

### 1. Introduction

We use manually created synthetic notes (available at <https://github.com/DeepPhe/dphe-examples/reports>) to demonstrate the use of DeepPhe-CR API calls to process clinical notes.

DeepPhe-CR uses a simple RESTful architecture, following common conventions similar to many other APIs.

### 2. Synthetic Sample Report

#### Progress note: fake\_patient4\_doc1\_NOTE.txt

```
=====
Report ID.....1,doc1
Patient ID.....pt567567567
Patient Name.....Fake Patient4
Principal Date.....20110310 1025
Record Type.....NOTE
Patient DOB.....01/15/1949
```

Reason for Visit: Patient is a 62 year old post-menopausal female with a long history of lumpy breasts. She felt a mass on her right breast on self-examination that she hadn't noticed before. She also felt another lump in her left breast which she described as hard and painful.

Interim History: The patient is a 62 year old female who presents for evaluation of the masses. The patient's recent mammography on March 1, 2011 revealed a lobulated mass in the upper inner quadrant of the right breast at 2 o'clock position that measured 1.2x3.0 cm. Mammography also revealed a nodular mass in the upper inner quadrant of the left breast at 11 o'clock position that measured 2 cm in diameter. Ultrasound evaluation was performed on the area of the right breast and a 1.1x2.2x3.3 cm hypoechoic mass is seen in the 2 o'clock region. Ultrasound of the left breast at 11 o'clock revealed a 1.1x1.2x1.2 cm mass. Ultrasound of the right axillary lymph nodes was performed showing multiple thickened lymph nodes. Ultrasound of the left axilla revealed normal appearing lymph nodes.

Past History: She has a history of left ovarian carcinoma, treated with total abdominal hysterectomy, bilateral salpingo-oophorectomy in July 2002. She received neoadjuvant chemotherapy with Taxol and Carboplatin.

Physical Exam: Health appearing female in NAD.  
HEENT: NC/AT, PERRL, EOMI, Sclera non icteric  
NECK: Supple, no masses  
LUNGS: CTA, no wheezes, rales, rhonchi  
CARDIAC: RRR. No murmurs, rubs or gallops  
ADB: Soft, NT, ND, No HSM  
EXT: No clubbing, cyanosis or edema

Impression: A 62 year old female with bilateral breast masses seen on mammography and ultrasound scheduled for core biopsy of the right breast mass as well as the left breast nodule. She will return to discuss further treatment options once pathology is finalized.

### 3. Structure of API calls

All API calls follow a common structure, including:

- An “Authorization: Bearer” header field with the authorization token.
- A “Content-Type: text/plain” header field
- A unique identifier for the document and/or patient, as appropriate
- Document text sent as a binary payload

All of the API calls conform to a common basic format:

```
PUT/GET http://[hostname]:[port]/DeepPhe/[API call name]/doc/[doc name]
[document text]
```

where `[hostname]:port` specify the server name and port - `localhost:8080` by default.

### 4. Example call: summarizeOneDoc – single document summarization

To summarize a single document, the only necessary identifier is the document ID. No patient ID is needed. Following the pattern From section 3, the pattern is as follows:

```
PUT http://localhost:8080/DeepPhe/summarizeOneDoc/doc/doc1 [document text]
```

Using the command-line cURL tool (<https://curl.se/>) and the note stored in a file named “fake\_patient4\_doc1\_NOTE.txt”, we can make this call as follows:

```
curl -i -X GET http://localhost:8080/deepphe/summarizeDoc/doc/doc1 \
-H "Content-Type: text/plain" \
-H "Authorization: Bearer AbCdEf123456" \
--data-binary "@fake_patient4_doc1_NOTE.txt"
```

Note that this call uses the default Bearer token installed/provided with the system.

### 5. DeepPhe-CR output

Results are returned as structured JSON blocks containing lists and nested name, value dictionaries. A complete example is given in Section 7.

The `summarizeOneDoc` call given in Section 4, when applied to the note give in Section 2, will be used to describe the output.

Differences in output formats for specific calls are described alongside those calls.

The top-level output of a single document Id contains the following items:

|           |                                                                              |
|-----------|------------------------------------------------------------------------------|
| id        | the document Id submitted to the call                                        |
| patient   | A description of the patient and key information extracted from the document |
| neoplasms | a list of summarized tumors.                                                 |

These subsections are described in Sections 5.1 and 5.2 The full JSON output is given in Section 7.

## 5.1 Patient

The patient field contains:

|           |                                                                                                          |
|-----------|----------------------------------------------------------------------------------------------------------|
| id        | defaults to the docid for the summarizeOneDoc call                                                       |
| type      | document -type "Clinical Note"                                                                           |
| date      | date when processed                                                                                      |
| text      | the text of the note                                                                                     |
| sections  | a list of sections in the document. Each section has an ID, a type, and a start and end character offset |
| mentions  | a list of individual concepts mentioned in the document                                                  |
| relations | a list of relations between the mentions                                                                 |
| corefs    | a list of coreferences, currently unused                                                                 |

### 5.1.1 Mentions

A mention is a word or other string of characters identified by DeepPhe-CR as being relevant to one of the classes of information to be extracted. Each mention has several attributes:

|           |                                                                                 |
|-----------|---------------------------------------------------------------------------------|
| id:       | a unique identifier, generated by the system                                    |
| classUri: | a unique label corresponding to the DeepPhe-CR concept associated with the text |
| noteid:   | an internal identifier for the note                                             |
| begin:    | the starting character offset for the word/string                               |
| end:      | the ending character offset for the word/string                                 |

There are also several binary values that can modify each mention: *negated*, *uncertain*, *generic*, *conditional*, *historic*. These fields will have values of true as applicable. Thus, if the mention was associated with the phrase "patient has a history of cancer", the *historic* flag would be set to True.

An example for a mention of a breast mass:

```
{
  "id": "doc1_M_3",
  "classUri": "Mass",
  "noteId": "doc1_884540155",
  "begin": 428,
  "end": 432,
  "negated": false,
  "uncertain": false,
```

```

    "generic": false,
    "conditional": false,
    "historic": false,
    "temporality": ""
  }

```

### 5.1.2 Relations

A relation is an indication of a semantically meaningful link between two mentions. Relationships are given in as (subject,predicate,target) triples, indicating that the subject is in a relationship of type predicate with the target

**type:** A descriptor of the predicate of the relationship. Examples include `hasDiagnosis`, `hasTumorExtent`, `relationships` for clinical stage indicators, etc.

**sourceId:** the subject of the relationship, referring to an ID of one of the `mentions` in the document.

**targetId:** the ID of the mention of the object of the relationship.

Thus, for example the relationship:

```

{
  "type": "hasTumorExtent",
  "sourceId": "doc1_M_3",
  "targetId": "doc1_M_1"
}

```

indicates that mention `doc1_M_3` is a mention of a tumor that has an extent given by mention `doc1_M_1`.

## 5.2 Neoplasms

The neoplasms record is a list of the identified cancers. Each cancer is represented by the following items:

**id:** a unique, system-generated identifier for the neoplasm

**classUri:** a label for the class of neoplasm involved – for example, `"Mass_In_Breast"`

**attributes:** a list of attributes of the neoplasm

### 5.2.1 Neoplasm Attributes

Neoplasm attributes provide summarized descriptions of each cancer. Each attribute contains several metadata items:

**id:** a unique, system-generated identifier for the attribute

**classUri:** a label for the class of attribute involved – for example, `"Mass_In_Breast"`

**name:** a name for the attribute – for example, `"behavior"` or `"histology"`

**value:** the extracted value for the attribute

`confidenceFeatures`: a list of integers used internally by the DeepPhe system to calculate confidence values. These features are opaque and not designed to be used otherwise.

Each attribute also contains three lists of *evidence*: `directEvidence`, `indirectEvidence`, and `notEvidence`, corresponding respectively to those items that clearly support a summary, those that provide less direct support, and those that are not evidence for that item. Each evidence item is a copy of a specific mention (see A.5.1.1) from the text.

## 6. Complete API Specification

Note: As described in Section 3, all calls require “Content-Type: text/plain” and “Authorization: Bearer <token>” headers.

### 6.1 summarizeOneDoc

This basic call simply returns the result of summarizing the provided document.

|                   |                                                                              |
|-------------------|------------------------------------------------------------------------------|
| Pattern           | <code>http://localhost:8080/deepphe/summarizeOneDoc/doc/&lt;docId&gt;</code> |
| HTTP Method       | PUT                                                                          |
| HTTP request body | Text content of document                                                     |
| Response          | JSON object containing details extracted from the document                   |

### 6.2 summarizePatientDoc

This call will process a document associated with a given patient, retaining extracted information for a subsequent summary. The information returned will include the neoplasm summary for the given document, without any of the sections, mentions, or relations.

Summary information for the patient can be extracted by a subsequent call to `summarizePatient`, using the specified `<patientId>`. See Section 6.4 for details.

|                   |                                                                                                            |
|-------------------|------------------------------------------------------------------------------------------------------------|
| Pattern           | <code>http://localhost:8080/deepphe/summarizePatientDoc/patient/&lt;patientId&gt;/doc/&lt;docId&gt;</code> |
| HTTP Method       | PUT                                                                                                        |
| HTTP request body | Text content of document                                                                                   |
| Response          | JSON object containing details extracted from the document                                                 |

### 6.3 queuePatientDoc

This call is similar to `summarizePatientDoc`, but the summary is not directly returned. The only response is a JSON block indicating that the document has been queued.

|             |                                                                                                        |
|-------------|--------------------------------------------------------------------------------------------------------|
| Pattern     | <code>http://localhost:8080/deepphe/queuePatientDoc/patient/&lt;patientId&gt;/doc/&lt;docId&gt;</code> |
| HTTP Method | PUT                                                                                                    |



Name.....Fake Patient4\nPrincipal Date.....20110310  
1025\nRecord Type.....NOTE\nPatient  
DOB.....01/15/1949\nReason for Visit: Patient is a 62 year old post-menopausal female with a long history of lumpy breasts. She felt a mass on her right breast on self-examination that she hadn't noticed before. She also felt another lump in her left breast which she described as hard and painful.\n\nInterim History: The patient is a 62 year old female who presents for evaluation of the masses. The patient's recent mammography on March 1, 2011 revealed a lobulated mass in the upper inner quadrant of the right breast at 2 o'clock position that measured 1.2x3.0 cm. Mammography also revealed a nodular mass in the upper inner quadrant of the left breast at 11 o'clock position that measured 2 cm in diameter. \n\nUltrasound evaluation was performed on the area of the right breast and a 1.1x2.2x3.3 cm hypoechoic mass is seen in the 2 o'clock region. Ultrasound of the left breast at 11 o'clock revealed a 1.1x1.2x1.2 cm mass. Ultrasound of the right axillary lymph nodes was performed showing multiple thickened lymph nodes. Ultrasound of the left axilla revealed normal appearing lymph nodes.\n\nPast History: She has a history of left ovarian carcinoma, treated with total abdominal hysterectomy, bilateral salpingo-oophorectomy in July 2002. She received neoadjuvant chemotherapy with Taxol and Carboplatin.\n\nPhysical Exam: Health appearing female in NAD. \nHEENT: NC/AT, PERRL, EOMI, Sclera non icteric\nNECK: Supple, no masses\nLUNGS: CTA, no wheezes, rales, rhonchi\nCARDIAC: RRR. No murmurs, rubs or gallops\nADB: Soft, NT, ND, No HSM\nEXT: No clubbing, cyanosis or edema\n\nImpression: A 62 year old female with bilateral breast masses seen on mammography and ultrasound scheduled for core biopsy of the right breast mass as well as the left breast nodule. She will return to discuss further treatment options once pathology is finalized.\n\n",

```
"sections": [  
  {  
    "id": "doc1_S_1",  
    "type": "Pittsburgh Header",  
    "begin": 67,  
    "end": 594  
  },  
  {  
    "id": "doc1_S_2",  
    "type": "Interim History",  
    "begin": 611,  
    "end": 1608  
  },  
  {  
    "id": "doc1_S_3",  
    "type": "Examination",  
    "begin": 1623,  
    "end": 1871  
  },  
  {  
    "id": "doc1_S_4",  
    "type": "Impression",  
    "begin": 1883,  
    "end": 2137  
  }  
],
```

```
"mentions": [  
  {  
    "id": "doc1_884540155_M_1",  
    "classUri": "Lymph_Node",  
    "confidence": 0.0,  
    "noteId": "doc1_884540155",  
    "begin": 1308,  
    "end": 1319,  
    "negated": false,  
    "uncertain": false,  
    "generic": false,  
    "conditional": false,  
  }  
]
```

```
"historic": false,
"temporality": ""
},
{
  "id": "doc1_884540155_M_2",
  "classUri": "Mass",
  "confidence": 0.0,
  "noteId": "doc1_884540155",
  "begin": 1215,
  "end": 1219,
  "negated": false,
  "uncertain": false,
  "generic": false,
  "conditional": false,
  "historic": false,
  "temporality": ""
},
{
  "id": "doc1_884540155_M_3",
  "classUri": "Mass_In_Breast",
  "confidence": 0.0,
  "noteId": "doc1_884540155",
  "begin": 402,
  "end": 415,
  "negated": false,
  "uncertain": true,
  "generic": false,
  "conditional": false,
  "historic": true,
  "temporality": ""
},
{
  "id": "doc1_884540155_M_5",
  "classUri": "Mass_In_Breast",
  "confidence": 0.0,
  "noteId": "doc1_884540155",
  "begin": 2007,
  "end": 2018,
  "negated": false,
  "uncertain": false,
  "generic": false,
  "conditional": false,
  "historic": false,
  "temporality": ""
},
{
  "id": "doc1_884540155_M_4",
  "classUri": "Heart",
  "confidence": 0.0,
  "noteId": "doc1_884540155",
  "begin": 1765,
  "end": 1772,
  "negated": false,
  "uncertain": false,
  "generic": false,
  "conditional": false,
  "historic": false,
  "temporality": ""
},
{
  "id": "doc1_884540155_M_6",
  "classUri": "Axillary_Lymph_Node",
  "confidence": 0.0,
```



```
"noteId": "doc1_884540155",
"begin": 1246,
"end": 1266,
"negated": false,
"uncertain": false,
"generic": false,
"conditional": false,
"historic": false,
"temporality": ""
},
{
  "id": "doc1_884540155_M_7",
  "classUri": "Left_Axilla_Proper",
  "confidence": 0.0,
  "noteId": "doc1_884540155",
  "begin": 1340,
  "end": 1351,
  "negated": false,
  "uncertain": false,
  "generic": false,
  "conditional": false,
  "historic": false,
  "temporality": ""
},
{
  "id": "doc1_884540155_M_8",
  "classUri": "Right",
  "confidence": 0.0,
  "noteId": "doc1_884540155",
  "begin": 440,
  "end": 445,
  "negated": false,
  "uncertain": false,
  "generic": false,
  "conditional": false,
  "historic": false,
  "temporality": ""
},
{
  "id": "doc1_884540155_M_9",
  "classUri": "Upper_inner_Quadrant",
  "confidence": 0.0,
  "noteId": "doc1_884540155",
  "begin": 911,
  "end": 931,
  "negated": false,
  "uncertain": false,
  "generic": false,
  "conditional": false,
  "historic": false,
  "temporality": ""
},
{
  "id": "doc1_884540155_M_10",
  "classUri": "Breast",
  "confidence": 0.0,
  "noteId": "doc1_884540155",
  "begin": 2007,
  "end": 2013,
  "negated": false,
  "uncertain": false,
  "generic": false,
  "conditional": false,
```

```
"historic": false,
"temporality": ""
},
{
  "id": "doc1_884540155_M_11",
  "classUri": "Right",
  "confidence": 0.0,
  "noteId": "doc1_884540155",
  "begin": 1062,
  "end": 1067,
  "negated": false,
  "uncertain": false,
  "generic": false,
  "conditional": false,
  "historic": false,
  "temporality": ""
},
{
  "id": "doc1_884540155_M_12",
  "classUri": "Right",
  "confidence": 0.0,
  "noteId": "doc1_884540155",
  "begin": 1240,
  "end": 1245,
  "negated": false,
  "uncertain": false,
  "generic": false,
  "conditional": false,
  "historic": false,
  "temporality": ""
},
{
  "id": "doc1_884540155_M_13",
  "classUri": "Breast",
  "confidence": 0.0,
  "noteId": "doc1_884540155",
  "begin": 807,
  "end": 813,
  "negated": false,
  "uncertain": false,
  "generic": false,
  "conditional": false,
  "historic": false,
  "temporality": ""
},
{
  "id": "doc1_884540155_M_14",
  "classUri": "Bilateral",
  "confidence": 0.0,
  "noteId": "doc1_884540155",
  "begin": 1909,
  "end": 1918,
  "negated": false,
  "uncertain": false,
  "generic": false,
  "conditional": false,
  "historic": false,
  "temporality": ""
},
{
  "id": "doc1_884540155_M_15",
  "classUri": "Right",
  "confidence": 0.0,
```

```
"noteId": "doc1_884540155",
"begin": 801,
"end": 806,
"negated": false,
"uncertain": false,
"generic": false,
"conditional": false,
"historic": false,
"temporality": ""
},
{
  "id": "doc1_884540155_M_16",
  "classUri": "Neck",
  "confidence": 0.0,
  "noteId": "doc1_884540155",
  "begin": 1702,
  "end": 1706,
  "negated": false,
  "uncertain": false,
  "generic": false,
  "conditional": false,
  "historic": false,
  "temporality": ""
},
{
  "id": "doc1_884540155_M_17",
  "classUri": "Left",
  "confidence": 0.0,
  "noteId": "doc1_884540155",
  "begin": 1427,
  "end": 1431,
  "negated": false,
  "uncertain": true,
  "generic": false,
  "conditional": false,
  "historic": true,
  "temporality": ""
},
{
  "id": "doc1_884540155_M_18",
  "classUri": "Epithelial_Ovarian_Cancer",
  "confidence": 0.0,
  "noteId": "doc1_884540155",
  "begin": 1432,
  "end": 1449,
  "negated": false,
  "uncertain": false,
  "generic": false,
  "conditional": false,
  "historic": true,
  "temporality": ""
},
{
  "id": "doc1_884540155_M_19",
  "classUri": "Lung",
  "confidence": 0.0,
  "noteId": "doc1_884540155",
  "begin": 1726,
  "end": 1731,
  "negated": false,
  "uncertain": false,
  "generic": false,
  "conditional": false,
```

```
"historic": false,
"temporality": ""
},
{
  "id": "doc1_884540155_M_20",
  "classUri": "Dysplastic_Nevus",
  "confidence": 0.0,
  "noteId": "doc1_884540155",
  "begin": 1650,
  "end": 1653,
  "negated": false,
  "uncertain": false,
  "generic": false,
  "conditional": false,
  "historic": false,
  "temporality": ""
},
{
  "id": "doc1_884540155_M_21",
  "classUri": "Mass",
  "confidence": 0.0,
  "noteId": "doc1_884540155",
  "begin": 428,
  "end": 432,
  "negated": false,
  "uncertain": false,
  "generic": false,
  "conditional": false,
  "historic": false,
  "temporality": ""
},
{
  "id": "doc1_884540155_M_22",
  "classUri": "Mass",
  "confidence": 0.0,
  "noteId": "doc1_884540155",
  "begin": 528,
  "end": 532,
  "negated": false,
  "uncertain": false,
  "generic": false,
  "conditional": false,
  "historic": false,
  "temporality": ""
},
{
  "id": "doc1_884540155_M_24",
  "classUri": "Breast",
  "confidence": 0.0,
  "noteId": "doc1_884540155",
  "begin": 1168,
  "end": 1174,
  "negated": false,
  "uncertain": false,
  "generic": false,
  "conditional": false,
  "historic": false,
  "temporality": ""
},
{
  "id": "doc1_884540155_M_23",
  "classUri": "Lobular_Mass",
  "confidence": 0.0,
```

```
"noteId": "doc1_884540155",
"begin": 751,
"end": 765,
"negated": false,
"uncertain": false,
"generic": false,
"conditional": false,
"historic": false,
"temporality": ""
},
{
  "id": "doc1_884540155_M_25",
  "classUri": "Position_Of_Phenotypic_Abnormality",
  "confidence": 0.0,
  "noteId": "doc1_884540155",
  "begin": 827,
  "end": 835,
  "negated": false,
  "uncertain": false,
  "generic": false,
  "conditional": false,
  "historic": false,
  "temporality": ""
},
{
  "id": "doc1_884540155_M_26",
  "classUri": "Breast",
  "confidence": 0.0,
  "noteId": "doc1_884540155",
  "begin": 408,
  "end": 415,
  "negated": false,
  "uncertain": false,
  "generic": false,
  "conditional": false,
  "historic": true,
  "temporality": ""
},
{
  "id": "doc1_884540155_M_27",
  "classUri": "Breast",
  "confidence": 0.0,
  "noteId": "doc1_884540155",
  "begin": 1919,
  "end": 1925,
  "negated": false,
  "uncertain": false,
  "generic": false,
  "conditional": false,
  "historic": false,
  "temporality": ""
},
{
  "id": "doc1_884540155_M_28",
  "classUri": "Upper_inner_Quadrant",
  "confidence": 0.0,
  "noteId": "doc1_884540155",
  "begin": 773,
  "end": 793,
  "negated": false,
  "uncertain": false,
  "generic": false,
  "conditional": false,
```

```
"historic": false,
"temporality": ""
},
{
  "id": "doc1_884540155_M_30",
  "classUri": "Left",
  "confidence": 0.0,
  "noteId": "doc1_884540155",
  "begin": 1340,
  "end": 1344,
  "negated": false,
  "uncertain": false,
  "generic": false,
  "conditional": false,
  "historic": false,
  "temporality": ""
},
{
  "id": "doc1_884540155_M_29",
  "classUri": "Breast",
  "confidence": 0.0,
  "noteId": "doc1_884540155",
  "begin": 2039,
  "end": 2045,
  "negated": false,
  "uncertain": false,
  "generic": false,
  "conditional": false,
  "historic": false,
  "temporality": ""
},
{
  "id": "doc1_884540155_M_31",
  "classUri": "Left",
  "confidence": 0.0,
  "noteId": "doc1_884540155",
  "begin": 939,
  "end": 943,
  "negated": false,
  "uncertain": false,
  "generic": false,
  "conditional": false,
  "historic": false,
  "temporality": ""
},
{
  "id": "doc1_884540155_M_34",
  "classUri": "Left",
  "confidence": 0.0,
  "noteId": "doc1_884540155",
  "begin": 1163,
  "end": 1167,
  "negated": false,
  "uncertain": false,
  "generic": false,
  "conditional": false,
  "historic": false,
  "temporality": ""
},
{
  "id": "doc1_884540155_M_33",
  "classUri": "Sclera",
  "confidence": 0.0,
```

```
"noteId": "doc1_884540155",
"begin": 1683,
"end": 1689,
"negated": false,
"uncertain": false,
"generic": false,
"conditional": false,
"historic": false,
"temporality": ""
},
{
  "id": "doc1_884540155_M_32",
  "classUri": "Position_Of_Phenotypic_Abnormality",
  "confidence": 0.0,
  "noteId": "doc1_884540155",
  "begin": 965,
  "end": 973,
  "negated": false,
  "uncertain": false,
  "generic": false,
  "conditional": false,
  "historic": false,
  "temporality": ""
},
{
  "id": "doc1_884540155_M_35",
  "classUri": "Mass_In_Breast",
  "confidence": 0.0,
  "noteId": "doc1_884540155",
  "begin": 2039,
  "end": 2052,
  "negated": false,
  "uncertain": false,
  "generic": false,
  "conditional": false,
  "historic": false,
  "temporality": ""
},
{
  "id": "doc1_884540155_M_37",
  "classUri": "Left",
  "confidence": 0.0,
  "noteId": "doc1_884540155",
  "begin": 540,
  "end": 544,
  "negated": false,
  "uncertain": false,
  "generic": false,
  "conditional": false,
  "historic": false,
  "temporality": ""
},
{
  "id": "doc1_884540155_M_36",
  "classUri": "Mass",
  "confidence": 0.0,
  "noteId": "doc1_884540155",
  "begin": 899,
  "end": 903,
  "negated": false,
  "uncertain": false,
  "generic": false,
  "conditional": false,
```

```
"historic": false,
"temporality": ""
},
{
  "id": "doc1_884540155_M_38",
  "classUri": "Mass",
  "confidence": 0.0,
  "noteId": "doc1_884540155",
  "begin": 1107,
  "end": 1111,
  "negated": false,
  "uncertain": false,
  "generic": false,
  "conditional": false,
  "historic": false,
  "temporality": ""
},
{
  "id": "doc1_884540155_M_41",
  "classUri": "Bilateral",
  "confidence": 0.0,
  "noteId": "doc1_884540155",
  "begin": 1494,
  "end": 1503,
  "negated": false,
  "uncertain": false,
  "generic": false,
  "conditional": false,
  "historic": false,
  "temporality": ""
},
{
  "id": "doc1_884540155_M_40",
  "classUri": "Ovary",
  "confidence": 0.0,
  "noteId": "doc1_884540155",
  "begin": 1432,
  "end": 1439,
  "negated": false,
  "uncertain": false,
  "generic": false,
  "conditional": false,
  "historic": true,
  "temporality": ""
},
{
  "id": "doc1_884540155_M_39",
  "classUri": "Lymph_Node",
  "confidence": 0.0,
  "noteId": "doc1_884540155",
  "begin": 1378,
  "end": 1389,
  "negated": false,
  "uncertain": false,
  "generic": false,
  "conditional": false,
  "historic": false,
  "temporality": ""
},
{
  "id": "doc1_884540155_M_42",
  "classUri": "Left",
  "confidence": 0.0,
```



```
"noteId": "doc1_884540155",
"begin": 2034,
"end": 2038,
"negated": false,
"uncertain": false,
"generic": false,
"conditional": false,
"historic": false,
"temporality": ""
},
{
  "id": "doc1_884540155_M_44",
  "classUri": "Right",
  "confidence": 0.0,
  "noteId": "doc1_884540155",
  "begin": 2001,
  "end": 2006,
  "negated": false,
  "uncertain": false,
  "generic": false,
  "conditional": false,
  "historic": false,
  "temporality": ""
},
{
  "id": "doc1_884540155_M_43",
  "classUri": "Breast",
  "confidence": 0.0,
  "noteId": "doc1_884540155",
  "begin": 1068,
  "end": 1074,
  "negated": false,
  "uncertain": false,
  "generic": false,
  "conditional": false,
  "historic": false,
  "temporality": ""
},
{
  "id": "doc1_884540155_M_45",
  "classUri": "Breast",
  "confidence": 0.0,
  "noteId": "doc1_884540155",
  "begin": 944,
  "end": 950,
  "negated": false,
  "uncertain": false,
  "generic": false,
  "conditional": false,
  "historic": false,
  "temporality": ""
},
{
  "id": "doc1_884540155_M_46",
  "classUri": "Breast",
  "confidence": 0.0,
  "noteId": "doc1_884540155",
  "begin": 545,
  "end": 551,
  "negated": false,
  "uncertain": false,
  "generic": false,
  "conditional": false,
```

```

    "historic": false,
    "temporality": ""
  },
  {
    "id": "doc1_884540155_M_47",
    "classUri": "Breast",
    "confidence": 0.0,
    "noteId": "doc1_884540155",
    "begin": 446,
    "end": 452,
    "negated": false,
    "uncertain": false,
    "generic": false,
    "conditional": false,
    "historic": false,
    "temporality": ""
  }
],
"relations": [
  {
    "type": "Disease_Has_Associated_Anatomic_Site",
    "sourceId": "doc1_884540155_M_18",
    "targetId": "doc1_884540155_M_4",
    "confidence": 40.25
  },
  {
    "type": "Disease_Has_Associated_Anatomic_Site",
    "sourceId": "doc1_884540155_M_18",
    "targetId": "doc1_884540155_M_7",
    "confidence": 55.70000076293945
  },
  {
    "type": "Disease_Has_Associated_Anatomic_Site",
    "sourceId": "doc1_884540155_M_18",
    "targetId": "doc1_884540155_M_9",
    "confidence": 46.79999923706055
  },
  {
    "type": "Disease_Has_Associated_Anatomic_Site",
    "sourceId": "doc1_884540155_M_18",
    "targetId": "doc1_884540155_M_10",
    "confidence": 21.25
  },
  {
    "type": "Disease_Has_Associated_Anatomic_Site",
    "sourceId": "doc1_884540155_M_18",
    "targetId": "doc1_884540155_M_13",
    "confidence": 44.400001525878906
  },
  {
    "type": "Disease_Has_Associated_Anatomic_Site",
    "sourceId": "doc1_884540155_M_18",
    "targetId": "doc1_884540155_M_16",
    "confidence": 35.25
  },
  {
    "type": "Disease_Has_Associated_Anatomic_Site",
    "sourceId": "doc1_884540155_M_18",
    "targetId": "doc1_884540155_M_19",
    "confidence": 43.25
  },
  {
    "type": "Disease_Has_Associated_Anatomic_Site",

```

```
"sourceId": "doc1_884540155_M_18",
"targetId": "doc1_884540155_M_24",
"confidence": 52.20000076293945
},
{
  "type": "Disease_Has_Associated_Anatomic_Site",
  "sourceId": "doc1_884540155_M_18",
  "targetId": "doc1_884540155_M_26",
  "confidence": 11.5
},
{
  "type": "Disease_Has_Associated_Anatomic_Site",
  "sourceId": "doc1_884540155_M_18",
  "targetId": "doc1_884540155_M_27",
  "confidence": 24.75
},
{
  "type": "Disease_Has_Associated_Anatomic_Site",
  "sourceId": "doc1_884540155_M_18",
  "targetId": "doc1_884540155_M_28",
  "confidence": 44.0
},
{
  "type": "Disease_Has_Associated_Anatomic_Site",
  "sourceId": "doc1_884540155_M_18",
  "targetId": "doc1_884540155_M_29",
  "confidence": 19.5
},
{
  "type": "Disease_Has_Associated_Anatomic_Site",
  "sourceId": "doc1_884540155_M_18",
  "targetId": "doc1_884540155_M_33",
  "confidence": 46.5
},
{
  "type": "Disease_Has_Associated_Anatomic_Site",
  "sourceId": "doc1_884540155_M_18",
  "targetId": "doc1_884540155_M_40",
  "confidence": 100.0
},
{
  "type": "Disease_Has_Associated_Anatomic_Site",
  "sourceId": "doc1_884540155_M_18",
  "targetId": "doc1_884540155_M_43",
  "confidence": 49.70000076293945
},
{
  "type": "Disease_Has_Associated_Anatomic_Site",
  "sourceId": "doc1_884540155_M_18",
  "targetId": "doc1_884540155_M_45",
  "confidence": 47.20000076293945
},
{
  "type": "Disease_Has_Associated_Anatomic_Site",
  "sourceId": "doc1_884540155_M_18",
  "targetId": "doc1_884540155_M_46",
  "confidence": 11.5
},
{
  "type": "Disease_Has_Associated_Anatomic_Site",
  "sourceId": "doc1_884540155_M_18",
  "targetId": "doc1_884540155_M_47",
  "confidence": 11.5
}
```

```
},
{
  "type": "Disease_Has_Primary_Anatomic_Site",
  "sourceId": "doc1_884540155_M_18",
  "targetId": "doc1_884540155_M_40",
  "confidence": 85.0
},
{
  "type": "hasLaterality",
  "sourceId": "doc1_884540155_M_18",
  "targetId": "doc1_884540155_M_8",
  "confidence": 16.5
},
{
  "type": "hasLaterality",
  "sourceId": "doc1_884540155_M_18",
  "targetId": "doc1_884540155_M_11",
  "confidence": 54.599998474121094
},
{
  "type": "hasLaterality",
  "sourceId": "doc1_884540155_M_18",
  "targetId": "doc1_884540155_M_12",
  "confidence": 59.099998474121094
},
{
  "type": "hasLaterality",
  "sourceId": "doc1_884540155_M_18",
  "targetId": "doc1_884540155_M_14",
  "confidence": 30.0
},
{
  "type": "hasLaterality",
  "sourceId": "doc1_884540155_M_18",
  "targetId": "doc1_884540155_M_15",
  "confidence": 49.29999923706055
},
{
  "type": "hasLaterality",
  "sourceId": "doc1_884540155_M_18",
  "targetId": "doc1_884540155_M_17",
  "confidence": 59.95000076293945
},
{
  "type": "hasLaterality",
  "sourceId": "doc1_884540155_M_18",
  "targetId": "doc1_884540155_M_30",
  "confidence": 60.599998474121094
},
{
  "type": "hasLaterality",
  "sourceId": "doc1_884540155_M_18",
  "targetId": "doc1_884540155_M_31",
  "confidence": 52.099998474121094
},
{
  "type": "hasLaterality",
  "sourceId": "doc1_884540155_M_18",
  "targetId": "doc1_884540155_M_34",
  "confidence": 57.099998474121094
},
{
  "type": "hasLaterality",
```

```

    "sourceId": "doc1_884540155_M_18",
    "targetId": "doc1_884540155_M_37",
    "confidence": 16.5
  },
  {
    "type": "hasLaterality",
    "sourceId": "doc1_884540155_M_18",
    "targetId": "doc1_884540155_M_41",
    "confidence": 64.5999984741211
  },
  {
    "type": "hasLaterality",
    "sourceId": "doc1_884540155_M_18",
    "targetId": "doc1_884540155_M_42",
    "confidence": 24.75
  },
  {
    "type": "hasLaterality",
    "sourceId": "doc1_884540155_M_18",
    "targetId": "doc1_884540155_M_44",
    "confidence": 26.5
  },
  {
    "type": "hasQuadrant",
    "sourceId": "doc1_884540155_M_18",
    "targetId": "doc1_884540155_M_9",
    "confidence": 56.79999923706055
  },
  {
    "type": "hasQuadrant",
    "sourceId": "doc1_884540155_M_18",
    "targetId": "doc1_884540155_M_28",
    "confidence": 54.0
  }
]
}
],
},
"neoplasms": [
  {
    "id": "Mass_In_Breast_1683124727155",
    "classUri": "Mass_In_Breast",
    "attributes": [
      {
        "id": "Upper_inner_Quadrant_1683124727160",
        "classUri": "Upper_inner_Quadrant",
        "name": "topography_major",
        "value": "C502",
        "directEvidence": [
          {
            "id": "doc1_884540155_M_28",
            "classUri": "Upper_inner_Quadrant",
            "confidence": 0.0,
            "noteId": "doc1_884540155",
            "begin": 773,
            "end": 793,
            "negated": false,
            "uncertain": false,
            "generic": false,
            "conditional": false,
            "historic": false,
            "temporality": ""
          }
        ]
      }
    ]
  },

```

```
{
  "id": "doc1_884540155_M_45",
  "classUri": "Breast",
  "confidence": 0.0,
  "noteId": "doc1_884540155",
  "begin": 944,
  "end": 950,
  "negated": false,
  "uncertain": false,
  "generic": false,
  "conditional": false,
  "historic": false,
  "temporality": ""
},
{
  "id": "doc1_884540155_M_24",
  "classUri": "Breast",
  "confidence": 0.0,
  "noteId": "doc1_884540155",
  "begin": 1168,
  "end": 1174,
  "negated": false,
  "uncertain": false,
  "generic": false,
  "conditional": false,
  "historic": false,
  "temporality": ""
},
{
  "id": "doc1_884540155_M_9",
  "classUri": "Upper_inner_Quadrant",
  "confidence": 0.0,
  "noteId": "doc1_884540155",
  "begin": 911,
  "end": 931,
  "negated": false,
  "uncertain": false,
  "generic": false,
  "conditional": false,
  "historic": false,
  "temporality": ""
},
{
  "id": "doc1_884540155_M_46",
  "classUri": "Breast",
  "confidence": 0.0,
  "noteId": "doc1_884540155",
  "begin": 545,
  "end": 551,
  "negated": false,
  "uncertain": false,
  "generic": false,
  "conditional": false,
  "historic": false,
  "temporality": ""
},
{
  "id": "doc1_884540155_M_13",
  "classUri": "Breast",
  "confidence": 0.0,
  "noteId": "doc1_884540155",
  "begin": 807,
  "end": 813,
```

```
"negated": false,
"uncertain": false,
"generic": false,
"conditional": false,
"historic": false,
"temporality": ""
},
{
  "id": "doc1_884540155_M_26",
  "classUri": "Breast",
  "confidence": 0.0,
  "noteId": "doc1_884540155",
  "begin": 408,
  "end": 415,
  "negated": false,
  "uncertain": false,
  "generic": false,
  "conditional": false,
  "historic": true,
  "temporality": ""
},
{
  "id": "doc1_884540155_M_29",
  "classUri": "Breast",
  "confidence": 0.0,
  "noteId": "doc1_884540155",
  "begin": 2039,
  "end": 2045,
  "negated": false,
  "uncertain": false,
  "generic": false,
  "conditional": false,
  "historic": false,
  "temporality": ""
},
{
  "id": "doc1_884540155_M_47",
  "classUri": "Breast",
  "confidence": 0.0,
  "noteId": "doc1_884540155",
  "begin": 446,
  "end": 452,
  "negated": false,
  "uncertain": false,
  "generic": false,
  "conditional": false,
  "historic": false,
  "temporality": ""
},
{
  "id": "doc1_884540155_M_27",
  "classUri": "Breast",
  "confidence": 0.0,
  "noteId": "doc1_884540155",
  "begin": 1919,
  "end": 1925,
  "negated": false,
  "uncertain": false,
  "generic": false,
  "conditional": false,
  "historic": false,
  "temporality": ""
},
}
```

```
{
  "id": "doc1_884540155_M_10",
  "classUri": "Breast",
  "confidence": 0.0,
  "noteId": "doc1_884540155",
  "begin": 2007,
  "end": 2013,
  "negated": false,
  "uncertain": false,
  "generic": false,
  "conditional": false,
  "historic": false,
  "temporality": ""
},
{
  "id": "doc1_884540155_M_43",
  "classUri": "Breast",
  "confidence": 0.0,
  "noteId": "doc1_884540155",
  "begin": 1068,
  "end": 1074,
  "negated": false,
  "uncertain": false,
  "generic": false,
  "conditional": false,
  "historic": false,
  "temporality": ""
}
],
"indirectEvidence": [
  {
    "id": "doc1_884540155_M_4",
    "classUri": "Heart",
    "confidence": 0.0,
    "noteId": "doc1_884540155",
    "begin": 1765,
    "end": 1772,
    "negated": false,
    "uncertain": false,
    "generic": false,
    "conditional": false,
    "historic": false,
    "temporality": ""
  },
  {
    "id": "doc1_884540155_M_33",
    "classUri": "Sclera",
    "confidence": 0.0,
    "noteId": "doc1_884540155",
    "begin": 1683,
    "end": 1689,
    "negated": false,
    "uncertain": false,
    "generic": false,
    "conditional": false,
    "historic": false,
    "temporality": ""
  },
  {
    "id": "doc1_884540155_M_7",
    "classUri": "Left_Axilla_Proper",
    "confidence": 0.0,
    "noteId": "doc1_884540155",
```



```

    "begin": 1340,
    "end": 1351,
    "negated": false,
    "uncertain": false,
    "generic": false,
    "conditional": false,
    "historic": false,
    "temporality": ""
  },
  {
    "id": "doc1_884540155_M_19",
    "classUri": "Lung",
    "confidence": 0.0,
    "noteId": "doc1_884540155",
    "begin": 1726,
    "end": 1731,
    "negated": false,
    "uncertain": false,
    "generic": false,
    "conditional": false,
    "historic": false,
    "temporality": ""
  },
  {
    "id": "doc1_884540155_M_16",
    "classUri": "Neck",
    "confidence": 0.0,
    "noteId": "doc1_884540155",
    "begin": 1702,
    "end": 1706,
    "negated": false,
    "uncertain": false,
    "generic": false,
    "conditional": false,
    "historic": false,
    "temporality": ""
  },
  {
    "id": "doc1_884540155_M_40",
    "classUri": "Ovary",
    "confidence": 0.0,
    "noteId": "doc1_884540155",
    "begin": 1432,
    "end": 1439,
    "negated": false,
    "uncertain": false,
    "generic": false,
    "conditional": false,
    "historic": true,
    "temporality": ""
  }
],
"notEvidence": [],
"confidenceFeatures": []
},
{
  "id": "Upper_Inner_Quadrant_1683124727160",
  "classUri": "Upper_Inner_Quadrant",
  "name": "location",
  "value": "Upper_Inner_Quadrant",
  "directEvidence": [
    {
      "id": "doc1_884540155_M_28",

```

```
"classUri": "Upper_inner_Quadrant",
"confidence": 0.0,
"noteId": "doc1_884540155",
"begin": 773,
"end": 793,
"negated": false,
"uncertain": false,
"generic": false,
"conditional": false,
"historic": false,
"temporality": ""
},
{
  "id": "doc1_884540155_M_45",
  "classUri": "Breast",
  "confidence": 0.0,
  "noteId": "doc1_884540155",
  "begin": 944,
  "end": 950,
  "negated": false,
  "uncertain": false,
  "generic": false,
  "conditional": false,
  "historic": false,
  "temporality": ""
},
{
  "id": "doc1_884540155_M_24",
  "classUri": "Breast",
  "confidence": 0.0,
  "noteId": "doc1_884540155",
  "begin": 1168,
  "end": 1174,
  "negated": false,
  "uncertain": false,
  "generic": false,
  "conditional": false,
  "historic": false,
  "temporality": ""
},
{
  "id": "doc1_884540155_M_9",
  "classUri": "Upper_inner_Quadrant",
  "confidence": 0.0,
  "noteId": "doc1_884540155",
  "begin": 911,
  "end": 931,
  "negated": false,
  "uncertain": false,
  "generic": false,
  "conditional": false,
  "historic": false,
  "temporality": ""
},
{
  "id": "doc1_884540155_M_46",
  "classUri": "Breast",
  "confidence": 0.0,
  "noteId": "doc1_884540155",
  "begin": 545,
  "end": 551,
  "negated": false,
  "uncertain": false,
```

```
"generic": false,
"conditional": false,
"historic": false,
"temporality": ""
},
{
  "id": "doc1_884540155_M_13",
  "classUri": "Breast",
  "confidence": 0.0,
  "noteId": "doc1_884540155",
  "begin": 807,
  "end": 813,
  "negated": false,
  "uncertain": false,
  "generic": false,
  "conditional": false,
  "historic": false,
  "temporality": ""
},
{
  "id": "doc1_884540155_M_26",
  "classUri": "Breast",
  "confidence": 0.0,
  "noteId": "doc1_884540155",
  "begin": 408,
  "end": 415,
  "negated": false,
  "uncertain": false,
  "generic": false,
  "conditional": false,
  "historic": true,
  "temporality": ""
},
{
  "id": "doc1_884540155_M_29",
  "classUri": "Breast",
  "confidence": 0.0,
  "noteId": "doc1_884540155",
  "begin": 2039,
  "end": 2045,
  "negated": false,
  "uncertain": false,
  "generic": false,
  "conditional": false,
  "historic": false,
  "temporality": ""
},
{
  "id": "doc1_884540155_M_47",
  "classUri": "Breast",
  "confidence": 0.0,
  "noteId": "doc1_884540155",
  "begin": 446,
  "end": 452,
  "negated": false,
  "uncertain": false,
  "generic": false,
  "conditional": false,
  "historic": false,
  "temporality": ""
},
{
  "id": "doc1_884540155_M_27",
```

```
"classUri": "Breast",
"confidence": 0.0,
"noteId": "doc1_884540155",
"begin": 1919,
"end": 1925,
"negated": false,
"uncertain": false,
"generic": false,
"conditional": false,
"historic": false,
"temporality": ""
},
{
  "id": "doc1_884540155_M_10",
  "classUri": "Breast",
  "confidence": 0.0,
  "noteId": "doc1_884540155",
  "begin": 2007,
  "end": 2013,
  "negated": false,
  "uncertain": false,
  "generic": false,
  "conditional": false,
  "historic": false,
  "temporality": ""
},
{
  "id": "doc1_884540155_M_43",
  "classUri": "Breast",
  "confidence": 0.0,
  "noteId": "doc1_884540155",
  "begin": 1068,
  "end": 1074,
  "negated": false,
  "uncertain": false,
  "generic": false,
  "conditional": false,
  "historic": false,
  "temporality": ""
}
],
"indirectEvidence": [
  {
    "id": "doc1_884540155_M_4",
    "classUri": "Heart",
    "confidence": 0.0,
    "noteId": "doc1_884540155",
    "begin": 1765,
    "end": 1772,
    "negated": false,
    "uncertain": false,
    "generic": false,
    "conditional": false,
    "historic": false,
    "temporality": ""
  },
  {
    "id": "doc1_884540155_M_33",
    "classUri": "Sclera",
    "confidence": 0.0,
    "noteId": "doc1_884540155",
    "begin": 1683,
    "end": 1689,
```

```
"negated": false,
"uncertain": false,
"generic": false,
"conditional": false,
"historic": false,
"temporality": ""
},
{
  "id": "doc1_884540155_M_7",
  "classUri": "Left_Axilla_Proper",
  "confidence": 0.0,
  "noteId": "doc1_884540155",
  "begin": 1340,
  "end": 1351,
  "negated": false,
  "uncertain": false,
  "generic": false,
  "conditional": false,
  "historic": false,
  "temporality": ""
},
{
  "id": "doc1_884540155_M_19",
  "classUri": "Lung",
  "confidence": 0.0,
  "noteId": "doc1_884540155",
  "begin": 1726,
  "end": 1731,
  "negated": false,
  "uncertain": false,
  "generic": false,
  "conditional": false,
  "historic": false,
  "temporality": ""
},
{
  "id": "doc1_884540155_M_16",
  "classUri": "Neck",
  "confidence": 0.0,
  "noteId": "doc1_884540155",
  "begin": 1702,
  "end": 1706,
  "negated": false,
  "uncertain": false,
  "generic": false,
  "conditional": false,
  "historic": false,
  "temporality": ""
},
{
  "id": "doc1_884540155_M_40",
  "classUri": "Ovary",
  "confidence": 0.0,
  "noteId": "doc1_884540155",
  "begin": 1432,
  "end": 1439,
  "negated": false,
  "uncertain": false,
  "generic": false,
  "conditional": false,
  "historic": true,
  "temporality": ""
}
}
```

```

],
"notEvidence": [],
"confidenceFeatures": []
},
{
  "id": "Left_1683124727162",
  "classUri": "Left",
  "name": "laterality_code",
  "value": "2",
  "directEvidence": [
    {
      "id": "doc1_884540155_M_31",
      "classUri": "Left",
      "confidence": 0.0,
      "noteId": "doc1_884540155",
      "begin": 939,
      "end": 943,
      "negated": false,
      "uncertain": false,
      "generic": false,
      "conditional": false,
      "historic": false,
      "temporality": ""
    },
    {
      "id": "doc1_884540155_M_41",
      "classUri": "Bilateral",
      "confidence": 0.0,
      "noteId": "doc1_884540155",
      "begin": 1494,
      "end": 1503,
      "negated": false,
      "uncertain": false,
      "generic": false,
      "conditional": false,
      "historic": false,
      "temporality": ""
    }
  ],
  {
    "id": "doc1_884540155_M_8",
    "classUri": "Right",
    "confidence": 0.0,
    "noteId": "doc1_884540155",
    "begin": 440,
    "end": 445,
    "negated": false,
    "uncertain": false,
    "generic": false,
    "conditional": false,
    "historic": false,
    "temporality": ""
  },
  {
    "id": "doc1_884540155_M_17",
    "classUri": "Left",
    "confidence": 0.0,
    "noteId": "doc1_884540155",
    "begin": 1427,
    "end": 1431,
    "negated": false,
    "uncertain": true,
    "generic": false,
    "conditional": false,

```

```
"historic": true,
"temporality": ""
},
{
  "id": "doc1_884540155_M_11",
  "classUri": "Right",
  "confidence": 0.0,
  "noteId": "doc1_884540155",
  "begin": 1062,
  "end": 1067,
  "negated": false,
  "uncertain": false,
  "generic": false,
  "conditional": false,
  "historic": false,
  "temporality": ""
},
{
  "id": "doc1_884540155_M_15",
  "classUri": "Right",
  "confidence": 0.0,
  "noteId": "doc1_884540155",
  "begin": 801,
  "end": 806,
  "negated": false,
  "uncertain": false,
  "generic": false,
  "conditional": false,
  "historic": false,
  "temporality": ""
},
{
  "id": "doc1_884540155_M_34",
  "classUri": "Left",
  "confidence": 0.0,
  "noteId": "doc1_884540155",
  "begin": 1163,
  "end": 1167,
  "negated": false,
  "uncertain": false,
  "generic": false,
  "conditional": false,
  "historic": false,
  "temporality": ""
},
{
  "id": "doc1_884540155_M_37",
  "classUri": "Left",
  "confidence": 0.0,
  "noteId": "doc1_884540155",
  "begin": 540,
  "end": 544,
  "negated": false,
  "uncertain": false,
  "generic": false,
  "conditional": false,
  "historic": false,
  "temporality": ""
},
{
  "id": "doc1_884540155_M_14",
  "classUri": "Bilateral",
  "confidence": 0.0,
```

```
"noteId": "doc1_884540155",
"begin": 1909,
"end": 1918,
"negated": false,
"uncertain": false,
"generic": false,
"conditional": false,
"historic": false,
"temporality": ""
},
{
  "id": "doc1_884540155_M_30",
  "classUri": "Left",
  "confidence": 0.0,
  "noteId": "doc1_884540155",
  "begin": 1340,
  "end": 1344,
  "negated": false,
  "uncertain": false,
  "generic": false,
  "conditional": false,
  "historic": false,
  "temporality": ""
},
{
  "id": "doc1_884540155_M_44",
  "classUri": "Right",
  "confidence": 0.0,
  "noteId": "doc1_884540155",
  "begin": 2001,
  "end": 2006,
  "negated": false,
  "uncertain": false,
  "generic": false,
  "conditional": false,
  "historic": false,
  "temporality": ""
},
{
  "id": "doc1_884540155_M_12",
  "classUri": "Right",
  "confidence": 0.0,
  "noteId": "doc1_884540155",
  "begin": 1240,
  "end": 1245,
  "negated": false,
  "uncertain": false,
  "generic": false,
  "conditional": false,
  "historic": false,
  "temporality": ""
},
{
  "id": "doc1_884540155_M_42",
  "classUri": "Left",
  "confidence": 0.0,
  "noteId": "doc1_884540155",
  "begin": 2034,
  "end": 2038,
  "negated": false,
  "uncertain": false,
  "generic": false,
  "conditional": false,
```



```

        "historic": false,
        "temporality": ""
    }
],
"indirectEvidence": [],
"notEvidence": [],
"confidenceFeatures": []
},
{
    "id": "Left_1683124727162",
    "classUri": "Left",
    "name": "laterality",
    "value": "Left",
    "directEvidence": [
        {
            "id": "doc1_884540155_M_31",
            "classUri": "Left",
            "confidence": 0.0,
            "noteId": "doc1_884540155",
            "begin": 939,
            "end": 943,
            "negated": false,
            "uncertain": false,
            "generic": false,
            "conditional": false,
            "historic": false,
            "temporality": ""
        },
        {
            "id": "doc1_884540155_M_41",
            "classUri": "Bilateral",
            "confidence": 0.0,
            "noteId": "doc1_884540155",
            "begin": 1494,
            "end": 1503,
            "negated": false,
            "uncertain": false,
            "generic": false,
            "conditional": false,
            "historic": false,
            "temporality": ""
        },
        {
            "id": "doc1_884540155_M_8",
            "classUri": "Right",
            "confidence": 0.0,
            "noteId": "doc1_884540155",
            "begin": 440,
            "end": 445,
            "negated": false,
            "uncertain": false,
            "generic": false,
            "conditional": false,
            "historic": false,
            "temporality": ""
        },
        {
            "id": "doc1_884540155_M_17",
            "classUri": "Left",
            "confidence": 0.0,
            "noteId": "doc1_884540155",
            "begin": 1427,
            "end": 1431,

```

```
"negated": false,
"uncertain": true,
"generic": false,
"conditional": false,
"historic": true,
"temporality": ""
},
{
  "id": "doc1_884540155_M_11",
  "classUri": "Right",
  "confidence": 0.0,
  "noteId": "doc1_884540155",
  "begin": 1062,
  "end": 1067,
  "negated": false,
  "uncertain": false,
  "generic": false,
  "conditional": false,
  "historic": false,
  "temporality": ""
},
{
  "id": "doc1_884540155_M_15",
  "classUri": "Right",
  "confidence": 0.0,
  "noteId": "doc1_884540155",
  "begin": 801,
  "end": 806,
  "negated": false,
  "uncertain": false,
  "generic": false,
  "conditional": false,
  "historic": false,
  "temporality": ""
},
{
  "id": "doc1_884540155_M_34",
  "classUri": "Left",
  "confidence": 0.0,
  "noteId": "doc1_884540155",
  "begin": 1163,
  "end": 1167,
  "negated": false,
  "uncertain": false,
  "generic": false,
  "conditional": false,
  "historic": false,
  "temporality": ""
},
{
  "id": "doc1_884540155_M_37",
  "classUri": "Left",
  "confidence": 0.0,
  "noteId": "doc1_884540155",
  "begin": 540,
  "end": 544,
  "negated": false,
  "uncertain": false,
  "generic": false,
  "conditional": false,
  "historic": false,
  "temporality": ""
},
}
```

```
{
  "id": "doc1_884540155_M_14",
  "classUri": "Bilateral",
  "confidence": 0.0,
  "noteId": "doc1_884540155",
  "begin": 1909,
  "end": 1918,
  "negated": false,
  "uncertain": false,
  "generic": false,
  "conditional": false,
  "historic": false,
  "temporality": ""
},
{
  "id": "doc1_884540155_M_30",
  "classUri": "Left",
  "confidence": 0.0,
  "noteId": "doc1_884540155",
  "begin": 1340,
  "end": 1344,
  "negated": false,
  "uncertain": false,
  "generic": false,
  "conditional": false,
  "historic": false,
  "temporality": ""
},
{
  "id": "doc1_884540155_M_44",
  "classUri": "Right",
  "confidence": 0.0,
  "noteId": "doc1_884540155",
  "begin": 2001,
  "end": 2006,
  "negated": false,
  "uncertain": false,
  "generic": false,
  "conditional": false,
  "historic": false,
  "temporality": ""
},
{
  "id": "doc1_884540155_M_12",
  "classUri": "Right",
  "confidence": 0.0,
  "noteId": "doc1_884540155",
  "begin": 1240,
  "end": 1245,
  "negated": false,
  "uncertain": false,
  "generic": false,
  "conditional": false,
  "historic": false,
  "temporality": ""
},
{
  "id": "doc1_884540155_M_42",
  "classUri": "Left",
  "confidence": 0.0,
  "noteId": "doc1_884540155",
  "begin": 2034,
  "end": 2038,
```

```

        "negated": false,
        "uncertain": false,
        "generic": false,
        "conditional": false,
        "historic": false,
        "temporality": ""
    }
],
"indirectEvidence": [],
"notEvidence": [],
"confidenceFeatures": []
},
{
    "id": "Upper_inner_Quadrant_1683124727168",
    "classUri": "Upper_inner_Quadrant",
    "name": "topography_minor",
    "value": "9",
    "directEvidence": [
        {
            "id": "doc1_884540155_M_45",
            "classUri": "Breast",
            "confidence": 0.0,
            "noteId": "doc1_884540155",
            "begin": 944,
            "end": 950,
            "negated": false,
            "uncertain": false,
            "generic": false,
            "conditional": false,
            "historic": false,
            "temporality": ""
        },
        {
            "id": "doc1_884540155_M_24",
            "classUri": "Breast",
            "confidence": 0.0,
            "noteId": "doc1_884540155",
            "begin": 1168,
            "end": 1174,
            "negated": false,
            "uncertain": false,
            "generic": false,
            "conditional": false,
            "historic": false,
            "temporality": ""
        },
        {
            "id": "doc1_884540155_M_46",
            "classUri": "Breast",
            "confidence": 0.0,
            "noteId": "doc1_884540155",
            "begin": 545,
            "end": 551,
            "negated": false,
            "uncertain": false,
            "generic": false,
            "conditional": false,
            "historic": false,
            "temporality": ""
        },
        {
            "id": "doc1_884540155_M_47",
            "classUri": "Breast",

```

```
"confidence": 0.0,
"noteId": "doc1_884540155",
"begin": 446,
"end": 452,
"negated": false,
"uncertain": false,
"generic": false,
"conditional": false,
"historic": false,
"temporality": ""
},
{
  "id": "doc1_884540155_M_27",
  "classUri": "Breast",
  "confidence": 0.0,
  "noteId": "doc1_884540155",
  "begin": 1919,
  "end": 1925,
  "negated": false,
  "uncertain": false,
  "generic": false,
  "conditional": false,
  "historic": false,
  "temporality": ""
},
{
  "id": "doc1_884540155_M_19",
  "classUri": "Lung",
  "confidence": 0.0,
  "noteId": "doc1_884540155",
  "begin": 1726,
  "end": 1731,
  "negated": false,
  "uncertain": false,
  "generic": false,
  "conditional": false,
  "historic": false,
  "temporality": ""
},
{
  "id": "doc1_884540155_M_43",
  "classUri": "Breast",
  "confidence": 0.0,
  "noteId": "doc1_884540155",
  "begin": 1068,
  "end": 1074,
  "negated": false,
  "uncertain": false,
  "generic": false,
  "conditional": false,
  "historic": false,
  "temporality": ""
},
{
  "id": "doc1_884540155_M_28",
  "classUri": "Upper_inner_Quadrant",
  "confidence": 0.0,
  "noteId": "doc1_884540155",
  "begin": 773,
  "end": 793,
  "negated": false,
  "uncertain": false,
  "generic": false,
```

```
"conditional": false,
"historic": false,
"temporality": ""
},
{
  "id": "doc1_884540155_M_9",
  "classUri": "Upper_inner_Quadrant",
  "confidence": 0.0,
  "noteId": "doc1_884540155",
  "begin": 911,
  "end": 931,
  "negated": false,
  "uncertain": false,
  "generic": false,
  "conditional": false,
  "historic": false,
  "temporality": ""
},
{
  "id": "doc1_884540155_M_13",
  "classUri": "Breast",
  "confidence": 0.0,
  "noteId": "doc1_884540155",
  "begin": 807,
  "end": 813,
  "negated": false,
  "uncertain": false,
  "generic": false,
  "conditional": false,
  "historic": false,
  "temporality": ""
},
{
  "id": "doc1_884540155_M_26",
  "classUri": "Breast",
  "confidence": 0.0,
  "noteId": "doc1_884540155",
  "begin": 408,
  "end": 415,
  "negated": false,
  "uncertain": false,
  "generic": false,
  "conditional": false,
  "historic": true,
  "temporality": ""
},
{
  "id": "doc1_884540155_M_29",
  "classUri": "Breast",
  "confidence": 0.0,
  "noteId": "doc1_884540155",
  "begin": 2039,
  "end": 2045,
  "negated": false,
  "uncertain": false,
  "generic": false,
  "conditional": false,
  "historic": false,
  "temporality": ""
},
{
  "id": "doc1_884540155_M_10",
  "classUri": "Breast",
```

```

    "confidence": 0.0,
    "noteId": "doc1_884540155",
    "begin": 2007,
    "end": 2013,
    "negated": false,
    "uncertain": false,
    "generic": false,
    "conditional": false,
    "historic": false,
    "temporality": ""
  }
],
"indirectEvidence": [],
"notEvidence": [],
"confidenceFeatures": []
},
{
  "id": "Breast_Quadrant_1683124727168",
  "classUri": "Breast_Quadrant",
  "name": "quadrant",
  "value": "Upper_inner_Quadrant",
  "directEvidence": [
    {
      "id": "doc1_884540155_M_45",
      "classUri": "Breast",
      "confidence": 0.0,
      "noteId": "doc1_884540155",
      "begin": 944,
      "end": 950,
      "negated": false,
      "uncertain": false,
      "generic": false,
      "conditional": false,
      "historic": false,
      "temporality": ""
    },
    {
      "id": "doc1_884540155_M_24",
      "classUri": "Breast",
      "confidence": 0.0,
      "noteId": "doc1_884540155",
      "begin": 1168,
      "end": 1174,
      "negated": false,
      "uncertain": false,
      "generic": false,
      "conditional": false,
      "historic": false,
      "temporality": ""
    },
    {
      "id": "doc1_884540155_M_46",
      "classUri": "Breast",
      "confidence": 0.0,
      "noteId": "doc1_884540155",
      "begin": 545,
      "end": 551,
      "negated": false,
      "uncertain": false,
      "generic": false,
      "conditional": false,
      "historic": false,
      "temporality": ""
    }
  ]
}

```

```
},
{
  "id": "doc1_884540155_M_47",
  "classUri": "Breast",
  "confidence": 0.0,
  "noteId": "doc1_884540155",
  "begin": 446,
  "end": 452,
  "negated": false,
  "uncertain": false,
  "generic": false,
  "conditional": false,
  "historic": false,
  "temporality": ""
},
{
  "id": "doc1_884540155_M_27",
  "classUri": "Breast",
  "confidence": 0.0,
  "noteId": "doc1_884540155",
  "begin": 1919,
  "end": 1925,
  "negated": false,
  "uncertain": false,
  "generic": false,
  "conditional": false,
  "historic": false,
  "temporality": ""
},
{
  "id": "doc1_884540155_M_19",
  "classUri": "Lung",
  "confidence": 0.0,
  "noteId": "doc1_884540155",
  "begin": 1726,
  "end": 1731,
  "negated": false,
  "uncertain": false,
  "generic": false,
  "conditional": false,
  "historic": false,
  "temporality": ""
},
{
  "id": "doc1_884540155_M_43",
  "classUri": "Breast",
  "confidence": 0.0,
  "noteId": "doc1_884540155",
  "begin": 1068,
  "end": 1074,
  "negated": false,
  "uncertain": false,
  "generic": false,
  "conditional": false,
  "historic": false,
  "temporality": ""
},
{
  "id": "doc1_884540155_M_28",
  "classUri": "Upper_inner_Quadrant",
  "confidence": 0.0,
  "noteId": "doc1_884540155",
  "begin": 773,
```



```
"end": 793,
"negated": false,
"uncertain": false,
"generic": false,
"conditional": false,
"historic": false,
"temporality": ""
},
{
  "id": "doc1_884540155_M_9",
  "classUri": "Upper_inner_Quadrant",
  "confidence": 0.0,
  "noteId": "doc1_884540155",
  "begin": 911,
  "end": 931,
  "negated": false,
  "uncertain": false,
  "generic": false,
  "conditional": false,
  "historic": false,
  "temporality": ""
},
{
  "id": "doc1_884540155_M_13",
  "classUri": "Breast",
  "confidence": 0.0,
  "noteId": "doc1_884540155",
  "begin": 807,
  "end": 813,
  "negated": false,
  "uncertain": false,
  "generic": false,
  "conditional": false,
  "historic": false,
  "temporality": ""
},
{
  "id": "doc1_884540155_M_26",
  "classUri": "Breast",
  "confidence": 0.0,
  "noteId": "doc1_884540155",
  "begin": 408,
  "end": 415,
  "negated": false,
  "uncertain": false,
  "generic": false,
  "conditional": false,
  "historic": true,
  "temporality": ""
},
{
  "id": "doc1_884540155_M_29",
  "classUri": "Breast",
  "confidence": 0.0,
  "noteId": "doc1_884540155",
  "begin": 2039,
  "end": 2045,
  "negated": false,
  "uncertain": false,
  "generic": false,
  "conditional": false,
  "historic": false,
  "temporality": ""
}
```

```
},
{
  "id": "doc1_884540155_M_10",
  "classUri": "Breast",
  "confidence": 0.0,
  "noteId": "doc1_884540155",
  "begin": 2007,
  "end": 2013,
  "negated": false,
  "uncertain": false,
  "generic": false,
  "conditional": false,
  "historic": false,
  "temporality": ""
}
],
"indirectEvidence": [],
"notEvidence": [],
"confidenceFeatures": []
},
{
  "id": "Mass_In_Breast_1683124727175",
  "classUri": "Mass_In_Breast",
  "name": "histology",
  "value": "8727",
  "directEvidence": [
    {
      "id": "doc1_884540155_M_22",
      "classUri": "Mass",
      "confidence": 0.0,
      "noteId": "doc1_884540155",
      "begin": 528,
      "end": 532,
      "negated": false,
      "uncertain": false,
      "generic": false,
      "conditional": false,
      "historic": false,
      "temporality": ""
    },
    {
      "id": "doc1_884540155_M_3",
      "classUri": "Mass_In_Breast",
      "confidence": 0.0,
      "noteId": "doc1_884540155",
      "begin": 402,
      "end": 415,
      "negated": false,
      "uncertain": true,
      "generic": false,
      "conditional": false,
      "historic": true,
      "temporality": ""
    }
  ],
  {
    "id": "doc1_884540155_M_23",
    "classUri": "Lobular_Mass",
    "confidence": 0.0,
    "noteId": "doc1_884540155",
    "begin": 751,
    "end": 765,
    "negated": false,
    "uncertain": false,
```

```
"generic": false,
"conditional": false,
"historic": false,
"temporality": ""
},
{
  "id": "doc1_884540155_M_20",
  "classUri": "Dysplastic_Nevus",
  "confidence": 0.0,
  "noteId": "doc1_884540155",
  "begin": 1650,
  "end": 1653,
  "negated": false,
  "uncertain": false,
  "generic": false,
  "conditional": false,
  "historic": false,
  "temporality": ""
},
{
  "id": "doc1_884540155_M_35",
  "classUri": "Mass_In_Breast",
  "confidence": 0.0,
  "noteId": "doc1_884540155",
  "begin": 2039,
  "end": 2052,
  "negated": false,
  "uncertain": false,
  "generic": false,
  "conditional": false,
  "historic": false,
  "temporality": ""
},
{
  "id": "doc1_884540155_M_36",
  "classUri": "Mass",
  "confidence": 0.0,
  "noteId": "doc1_884540155",
  "begin": 899,
  "end": 903,
  "negated": false,
  "uncertain": false,
  "generic": false,
  "conditional": false,
  "historic": false,
  "temporality": ""
},
{
  "id": "doc1_884540155_M_5",
  "classUri": "Mass_In_Breast",
  "confidence": 0.0,
  "noteId": "doc1_884540155",
  "begin": 2007,
  "end": 2018,
  "negated": false,
  "uncertain": false,
  "generic": false,
  "conditional": false,
  "historic": false,
  "temporality": ""
},
{
  "id": "doc1_884540155_M_38",
```

```
    "classUri": "Mass",
    "confidence": 0.0,
    "noteId": "doc1_884540155",
    "begin": 1107,
    "end": 1111,
    "negated": false,
    "uncertain": false,
    "generic": false,
    "conditional": false,
    "historic": false,
    "temporality": ""
  },
  {
    "id": "doc1_884540155_M_21",
    "classUri": "Mass",
    "confidence": 0.0,
    "noteId": "doc1_884540155",
    "begin": 428,
    "end": 432,
    "negated": false,
    "uncertain": false,
    "generic": false,
    "conditional": false,
    "historic": false,
    "temporality": ""
  },
  {
    "id": "doc1_884540155_M_18",
    "classUri": "Epithelial_Ovarian_Cancer",
    "confidence": 0.0,
    "noteId": "doc1_884540155",
    "begin": 1432,
    "end": 1449,
    "negated": false,
    "uncertain": false,
    "generic": false,
    "conditional": false,
    "historic": true,
    "temporality": ""
  },
  {
    "id": "doc1_884540155_M_2",
    "classUri": "Mass",
    "confidence": 0.0,
    "noteId": "doc1_884540155",
    "begin": 1215,
    "end": 1219,
    "negated": false,
    "uncertain": false,
    "generic": false,
    "conditional": false,
    "historic": false,
    "temporality": ""
  }
],
"indirectEvidence": [],
"notEvidence": [],
"confidenceFeatures": []
},
{
  "id": "Mass_In_Breast_1683124727175",
  "classUri": "Mass_In_Breast",
  "name": "cancer_type",
```

```
"value": "Mass_In_Breast",
"directEvidence": [
  {
    "id": "doc1_884540155_M_22",
    "classUri": "Mass",
    "confidence": 0.0,
    "noteId": "doc1_884540155",
    "begin": 528,
    "end": 532,
    "negated": false,
    "uncertain": false,
    "generic": false,
    "conditional": false,
    "historic": false,
    "temporality": ""
  },
  {
    "id": "doc1_884540155_M_3",
    "classUri": "Mass_In_Breast",
    "confidence": 0.0,
    "noteId": "doc1_884540155",
    "begin": 402,
    "end": 415,
    "negated": false,
    "uncertain": true,
    "generic": false,
    "conditional": false,
    "historic": true,
    "temporality": ""
  },
  {
    "id": "doc1_884540155_M_23",
    "classUri": "Lobular_Mass",
    "confidence": 0.0,
    "noteId": "doc1_884540155",
    "begin": 751,
    "end": 765,
    "negated": false,
    "uncertain": false,
    "generic": false,
    "conditional": false,
    "historic": false,
    "temporality": ""
  },
  {
    "id": "doc1_884540155_M_20",
    "classUri": "Dysplastic_Nevus",
    "confidence": 0.0,
    "noteId": "doc1_884540155",
    "begin": 1650,
    "end": 1653,
    "negated": false,
    "uncertain": false,
    "generic": false,
    "conditional": false,
    "historic": false,
    "temporality": ""
  },
  {
    "id": "doc1_884540155_M_35",
    "classUri": "Mass_In_Breast",
    "confidence": 0.0,
    "noteId": "doc1_884540155",
```

```
"begin": 2039,
"end": 2052,
"negated": false,
"uncertain": false,
"generic": false,
"conditional": false,
"historic": false,
"temporality": ""
},
{
  "id": "doc1_884540155_M_36",
  "classUri": "Mass",
  "confidence": 0.0,
  "noteId": "doc1_884540155",
  "begin": 899,
  "end": 903,
  "negated": false,
  "uncertain": false,
  "generic": false,
  "conditional": false,
  "historic": false,
  "temporality": ""
},
{
  "id": "doc1_884540155_M_5",
  "classUri": "Mass_In_Breast",
  "confidence": 0.0,
  "noteId": "doc1_884540155",
  "begin": 2007,
  "end": 2018,
  "negated": false,
  "uncertain": false,
  "generic": false,
  "conditional": false,
  "historic": false,
  "temporality": ""
},
{
  "id": "doc1_884540155_M_38",
  "classUri": "Mass",
  "confidence": 0.0,
  "noteId": "doc1_884540155",
  "begin": 1107,
  "end": 1111,
  "negated": false,
  "uncertain": false,
  "generic": false,
  "conditional": false,
  "historic": false,
  "temporality": ""
},
{
  "id": "doc1_884540155_M_21",
  "classUri": "Mass",
  "confidence": 0.0,
  "noteId": "doc1_884540155",
  "begin": 428,
  "end": 432,
  "negated": false,
  "uncertain": false,
  "generic": false,
  "conditional": false,
  "historic": false,
```

```

    "temporality": ""
  },
  {
    "id": "doc1_884540155_M_18",
    "classUri": "Epithelial_Ovarian_Cancer",
    "confidence": 0.0,
    "noteId": "doc1_884540155",
    "begin": 1432,
    "end": 1449,
    "negated": false,
    "uncertain": false,
    "generic": false,
    "conditional": false,
    "historic": true,
    "temporality": ""
  },
  {
    "id": "doc1_884540155_M_2",
    "classUri": "Mass",
    "confidence": 0.0,
    "noteId": "doc1_884540155",
    "begin": 1215,
    "end": 1219,
    "negated": false,
    "uncertain": false,
    "generic": false,
    "conditional": false,
    "historic": false,
    "temporality": ""
  }
],
"indirectEvidence": [],
"notEvidence": [],
"confidenceFeatures": []
},
{
  "id": "Mass_In_Breast_1683124727175",
  "classUri": "Mass_In_Breast",
  "name": "histologic_type",
  "value": "Mass_In_Breast",
  "directEvidence": [
    {
      "id": "doc1_884540155_M_22",
      "classUri": "Mass",
      "confidence": 0.0,
      "noteId": "doc1_884540155",
      "begin": 528,
      "end": 532,
      "negated": false,
      "uncertain": false,
      "generic": false,
      "conditional": false,
      "historic": false,
      "temporality": ""
    },
    {
      "id": "doc1_884540155_M_3",
      "classUri": "Mass_In_Breast",
      "confidence": 0.0,
      "noteId": "doc1_884540155",
      "begin": 402,
      "end": 415,
      "negated": false,

```

```
"uncertain": true,
"generic": false,
"conditional": false,
"historic": true,
"temporality": ""
},
{
  "id": "doc1_884540155_M_23",
  "classUri": "Lobular_Mass",
  "confidence": 0.0,
  "noteId": "doc1_884540155",
  "begin": 751,
  "end": 765,
  "negated": false,
  "uncertain": false,
  "generic": false,
  "conditional": false,
  "historic": false,
  "temporality": ""
},
{
  "id": "doc1_884540155_M_20",
  "classUri": "Dysplastic_Nevus",
  "confidence": 0.0,
  "noteId": "doc1_884540155",
  "begin": 1650,
  "end": 1653,
  "negated": false,
  "uncertain": false,
  "generic": false,
  "conditional": false,
  "historic": false,
  "temporality": ""
},
{
  "id": "doc1_884540155_M_35",
  "classUri": "Mass_In_Breast",
  "confidence": 0.0,
  "noteId": "doc1_884540155",
  "begin": 2039,
  "end": 2052,
  "negated": false,
  "uncertain": false,
  "generic": false,
  "conditional": false,
  "historic": false,
  "temporality": ""
},
{
  "id": "doc1_884540155_M_36",
  "classUri": "Mass",
  "confidence": 0.0,
  "noteId": "doc1_884540155",
  "begin": 899,
  "end": 903,
  "negated": false,
  "uncertain": false,
  "generic": false,
  "conditional": false,
  "historic": false,
  "temporality": ""
},
{
```



```
"id": "doc1_884540155_M_5",
"classUri": "Mass_In_Breast",
"confidence": 0.0,
"noteId": "doc1_884540155",
"begin": 2007,
"end": 2018,
"negated": false,
"uncertain": false,
"generic": false,
"conditional": false,
"historic": false,
"temporality": ""
},
{
  "id": "doc1_884540155_M_38",
  "classUri": "Mass",
  "confidence": 0.0,
  "noteId": "doc1_884540155",
  "begin": 1107,
  "end": 1111,
  "negated": false,
  "uncertain": false,
  "generic": false,
  "conditional": false,
  "historic": false,
  "temporality": ""
},
{
  "id": "doc1_884540155_M_21",
  "classUri": "Mass",
  "confidence": 0.0,
  "noteId": "doc1_884540155",
  "begin": 428,
  "end": 432,
  "negated": false,
  "uncertain": false,
  "generic": false,
  "conditional": false,
  "historic": false,
  "temporality": ""
},
{
  "id": "doc1_884540155_M_18",
  "classUri": "Epithelial_Ovarian_Cancer",
  "confidence": 0.0,
  "noteId": "doc1_884540155",
  "begin": 1432,
  "end": 1449,
  "negated": false,
  "uncertain": false,
  "generic": false,
  "conditional": false,
  "historic": true,
  "temporality": ""
},
{
  "id": "doc1_884540155_M_2",
  "classUri": "Mass",
  "confidence": 0.0,
  "noteId": "doc1_884540155",
  "begin": 1215,
  "end": 1219,
  "negated": false,
```

```

    "uncertain": false,
    "generic": false,
    "conditional": false,
    "historic": false,
    "temporality": ""
  }
],
"indirectEvidence": [],
"notEvidence": [],
"confidenceFeatures": []
},
{
  "id": "Mass_In_Breast_1683124727175",
  "classUri": "Mass_In_Breast",
  "name": "diagnosis",
  "value": "Mass_In_Breast",
  "directEvidence": [
    {
      "id": "doc1_884540155_M_22",
      "classUri": "Mass",
      "confidence": 0.0,
      "noteId": "doc1_884540155",
      "begin": 528,
      "end": 532,
      "negated": false,
      "uncertain": false,
      "generic": false,
      "conditional": false,
      "historic": false,
      "temporality": ""
    },
    {
      "id": "doc1_884540155_M_3",
      "classUri": "Mass_In_Breast",
      "confidence": 0.0,
      "noteId": "doc1_884540155",
      "begin": 402,
      "end": 415,
      "negated": false,
      "uncertain": true,
      "generic": false,
      "conditional": false,
      "historic": true,
      "temporality": ""
    },
    {
      "id": "doc1_884540155_M_23",
      "classUri": "Lobular_Mass",
      "confidence": 0.0,
      "noteId": "doc1_884540155",
      "begin": 751,
      "end": 765,
      "negated": false,
      "uncertain": false,
      "generic": false,
      "conditional": false,
      "historic": false,
      "temporality": ""
    },
    {
      "id": "doc1_884540155_M_20",
      "classUri": "Dysplastic_Nevus",
      "confidence": 0.0,

```

```
"noteId": "doc1_884540155",
"begin": 1650,
"end": 1653,
"negated": false,
"uncertain": false,
"generic": false,
"conditional": false,
"historic": false,
"temporality": ""
},
{
  "id": "doc1_884540155_M_35",
  "classUri": "Mass_In_Breast",
  "confidence": 0.0,
  "noteId": "doc1_884540155",
  "begin": 2039,
  "end": 2052,
  "negated": false,
  "uncertain": false,
  "generic": false,
  "conditional": false,
  "historic": false,
  "temporality": ""
},
{
  "id": "doc1_884540155_M_36",
  "classUri": "Mass",
  "confidence": 0.0,
  "noteId": "doc1_884540155",
  "begin": 899,
  "end": 903,
  "negated": false,
  "uncertain": false,
  "generic": false,
  "conditional": false,
  "historic": false,
  "temporality": ""
},
{
  "id": "doc1_884540155_M_5",
  "classUri": "Mass_In_Breast",
  "confidence": 0.0,
  "noteId": "doc1_884540155",
  "begin": 2007,
  "end": 2018,
  "negated": false,
  "uncertain": false,
  "generic": false,
  "conditional": false,
  "historic": false,
  "temporality": ""
},
{
  "id": "doc1_884540155_M_38",
  "classUri": "Mass",
  "confidence": 0.0,
  "noteId": "doc1_884540155",
  "begin": 1107,
  "end": 1111,
  "negated": false,
  "uncertain": false,
  "generic": false,
  "conditional": false,
```

```

    "historic": false,
    "temporality": ""
  },
  {
    "id": "doc1_884540155_M_21",
    "classUri": "Mass",
    "confidence": 0.0,
    "noteId": "doc1_884540155",
    "begin": 428,
    "end": 432,
    "negated": false,
    "uncertain": false,
    "generic": false,
    "conditional": false,
    "historic": false,
    "temporality": ""
  },
  {
    "id": "doc1_884540155_M_18",
    "classUri": "Epithelial_Ovarian_Cancer",
    "confidence": 0.0,
    "noteId": "doc1_884540155",
    "begin": 1432,
    "end": 1449,
    "negated": false,
    "uncertain": false,
    "generic": false,
    "conditional": false,
    "historic": true,
    "temporality": ""
  },
  {
    "id": "doc1_884540155_M_2",
    "classUri": "Mass",
    "confidence": 0.0,
    "noteId": "doc1_884540155",
    "begin": 1215,
    "end": 1219,
    "negated": false,
    "uncertain": false,
    "generic": false,
    "conditional": false,
    "historic": false,
    "temporality": ""
  }
],
"indirectEvidence": [],
"notEvidence": [],
"confidenceFeatures": []
},
{
  "id": "Mass_In_Breast_1683124727183",
  "classUri": "Mass_In_Breast",
  "name": "behavior",
  "value": "3",
  "directEvidence": [
    {
      "id": "doc1_884540155_M_22",
      "classUri": "Mass",
      "confidence": 0.0,
      "noteId": "doc1_884540155",
      "begin": 528,
      "end": 532,
    }
  ]
}

```

```
"negated": false,
"uncertain": false,
"generic": false,
"conditional": false,
"historic": false,
"temporality": ""
},
{
  "id": "doc1_884540155_M_3",
  "classUri": "Mass_In_Breast",
  "confidence": 0.0,
  "noteId": "doc1_884540155",
  "begin": 402,
  "end": 415,
  "negated": false,
  "uncertain": true,
  "generic": false,
  "conditional": false,
  "historic": true,
  "temporality": ""
},
{
  "id": "doc1_884540155_M_23",
  "classUri": "Lobular_Mass",
  "confidence": 0.0,
  "noteId": "doc1_884540155",
  "begin": 751,
  "end": 765,
  "negated": false,
  "uncertain": false,
  "generic": false,
  "conditional": false,
  "historic": false,
  "temporality": ""
},
{
  "id": "doc1_884540155_M_20",
  "classUri": "Dysplastic_Nevus",
  "confidence": 0.0,
  "noteId": "doc1_884540155",
  "begin": 1650,
  "end": 1653,
  "negated": false,
  "uncertain": false,
  "generic": false,
  "conditional": false,
  "historic": false,
  "temporality": ""
},
{
  "id": "doc1_884540155_M_35",
  "classUri": "Mass_In_Breast",
  "confidence": 0.0,
  "noteId": "doc1_884540155",
  "begin": 2039,
  "end": 2052,
  "negated": false,
  "uncertain": false,
  "generic": false,
  "conditional": false,
  "historic": false,
  "temporality": ""
},
}
```

```
{
  "id": "doc1_884540155_M_36",
  "classUri": "Mass",
  "confidence": 0.0,
  "noteId": "doc1_884540155",
  "begin": 899,
  "end": 903,
  "negated": false,
  "uncertain": false,
  "generic": false,
  "conditional": false,
  "historic": false,
  "temporality": ""
},
{
  "id": "doc1_884540155_M_5",
  "classUri": "Mass_In_Breast",
  "confidence": 0.0,
  "noteId": "doc1_884540155",
  "begin": 2007,
  "end": 2018,
  "negated": false,
  "uncertain": false,
  "generic": false,
  "conditional": false,
  "historic": false,
  "temporality": ""
},
{
  "id": "doc1_884540155_M_38",
  "classUri": "Mass",
  "confidence": 0.0,
  "noteId": "doc1_884540155",
  "begin": 1107,
  "end": 1111,
  "negated": false,
  "uncertain": false,
  "generic": false,
  "conditional": false,
  "historic": false,
  "temporality": ""
},
{
  "id": "doc1_884540155_M_21",
  "classUri": "Mass",
  "confidence": 0.0,
  "noteId": "doc1_884540155",
  "begin": 428,
  "end": 432,
  "negated": false,
  "uncertain": false,
  "generic": false,
  "conditional": false,
  "historic": false,
  "temporality": ""
},
{
  "id": "doc1_884540155_M_18",
  "classUri": "Epithelial_Ovarian_Cancer",
  "confidence": 0.0,
  "noteId": "doc1_884540155",
  "begin": 1432,
  "end": 1449,
```

```

    "negated": false,
    "uncertain": false,
    "generic": false,
    "conditional": false,
    "historic": true,
    "temporality": ""
  },
  {
    "id": "doc1_884540155_M_2",
    "classUri": "Mass",
    "confidence": 0.0,
    "noteId": "doc1_884540155",
    "begin": 1215,
    "end": 1219,
    "negated": false,
    "uncertain": false,
    "generic": false,
    "conditional": false,
    "historic": false,
    "temporality": ""
  }
],
"indirectEvidence": [],
"notEvidence": [],
"confidenceFeatures": []
},
{
  "id": "Mass_In_Breast_1683124727183",
  "classUri": "Mass_In_Breast",
  "name": "extent",
  "value": "Invasive_Lesion",
  "directEvidence": [
    {
      "id": "doc1_884540155_M_22",
      "classUri": "Mass",
      "confidence": 0.0,
      "noteId": "doc1_884540155",
      "begin": 528,
      "end": 532,
      "negated": false,
      "uncertain": false,
      "generic": false,
      "conditional": false,
      "historic": false,
      "temporality": ""
    },
    {
      "id": "doc1_884540155_M_3",
      "classUri": "Mass_In_Breast",
      "confidence": 0.0,
      "noteId": "doc1_884540155",
      "begin": 402,
      "end": 415,
      "negated": false,
      "uncertain": true,
      "generic": false,
      "conditional": false,
      "historic": true,
      "temporality": ""
    }
  ],
  {
    "id": "doc1_884540155_M_23",
    "classUri": "Lobular_Mass",

```

```
"confidence": 0.0,
"noteId": "doc1_884540155",
"begin": 751,
"end": 765,
"negated": false,
"uncertain": false,
"generic": false,
"conditional": false,
"historic": false,
"temporality": ""
},
{
  "id": "doc1_884540155_M_20",
  "classUri": "Dysplastic_Nevus",
  "confidence": 0.0,
  "noteId": "doc1_884540155",
  "begin": 1650,
  "end": 1653,
  "negated": false,
  "uncertain": false,
  "generic": false,
  "conditional": false,
  "historic": false,
  "temporality": ""
},
{
  "id": "doc1_884540155_M_35",
  "classUri": "Mass_In_Breast",
  "confidence": 0.0,
  "noteId": "doc1_884540155",
  "begin": 2039,
  "end": 2052,
  "negated": false,
  "uncertain": false,
  "generic": false,
  "conditional": false,
  "historic": false,
  "temporality": ""
},
{
  "id": "doc1_884540155_M_36",
  "classUri": "Mass",
  "confidence": 0.0,
  "noteId": "doc1_884540155",
  "begin": 899,
  "end": 903,
  "negated": false,
  "uncertain": false,
  "generic": false,
  "conditional": false,
  "historic": false,
  "temporality": ""
},
{
  "id": "doc1_884540155_M_5",
  "classUri": "Mass_In_Breast",
  "confidence": 0.0,
  "noteId": "doc1_884540155",
  "begin": 2007,
  "end": 2018,
  "negated": false,
  "uncertain": false,
  "generic": false,
```



```
"conditional": false,
"historic": false,
"temporality": ""
},
{
  "id": "doc1_884540155_M_38",
  "classUri": "Mass",
  "confidence": 0.0,
  "noteId": "doc1_884540155",
  "begin": 1107,
  "end": 1111,
  "negated": false,
  "uncertain": false,
  "generic": false,
  "conditional": false,
  "historic": false,
  "temporality": ""
},
{
  "id": "doc1_884540155_M_21",
  "classUri": "Mass",
  "confidence": 0.0,
  "noteId": "doc1_884540155",
  "begin": 428,
  "end": 432,
  "negated": false,
  "uncertain": false,
  "generic": false,
  "conditional": false,
  "historic": false,
  "temporality": ""
},
{
  "id": "doc1_884540155_M_18",
  "classUri": "Epithelial_Ovarian_Cancer",
  "confidence": 0.0,
  "noteId": "doc1_884540155",
  "begin": 1432,
  "end": 1449,
  "negated": false,
  "uncertain": false,
  "generic": false,
  "conditional": false,
  "historic": true,
  "temporality": ""
},
{
  "id": "doc1_884540155_M_2",
  "classUri": "Mass",
  "confidence": 0.0,
  "noteId": "doc1_884540155",
  "begin": 1215,
  "end": 1219,
  "negated": false,
  "uncertain": false,
  "generic": false,
  "conditional": false,
  "historic": false,
  "temporality": ""
}
},
"indirectEvidence": [],
"notEvidence": [],
```

```

"confidenceFeatures": []
},
{
  "id": "Mass_In_Breast_1683124727183",
  "classUri": "Mass_In_Breast",
  "name": "tumor_type",
  "value": "PrimaryTumor",
  "directEvidence": [
    {
      "id": "doc1_884540155_M_22",
      "classUri": "Mass",
      "confidence": 0.0,
      "noteId": "doc1_884540155",
      "begin": 528,
      "end": 532,
      "negated": false,
      "uncertain": false,
      "generic": false,
      "conditional": false,
      "historic": false,
      "temporality": ""
    },
    {
      "id": "doc1_884540155_M_3",
      "classUri": "Mass_In_Breast",
      "confidence": 0.0,
      "noteId": "doc1_884540155",
      "begin": 402,
      "end": 415,
      "negated": false,
      "uncertain": true,
      "generic": false,
      "conditional": false,
      "historic": true,
      "temporality": ""
    },
    {
      "id": "doc1_884540155_M_23",
      "classUri": "Lobular_Mass",
      "confidence": 0.0,
      "noteId": "doc1_884540155",
      "begin": 751,
      "end": 765,
      "negated": false,
      "uncertain": false,
      "generic": false,
      "conditional": false,
      "historic": false,
      "temporality": ""
    },
    {
      "id": "doc1_884540155_M_20",
      "classUri": "Dysplastic_Nevus",
      "confidence": 0.0,
      "noteId": "doc1_884540155",
      "begin": 1650,
      "end": 1653,
      "negated": false,
      "uncertain": false,
      "generic": false,
      "conditional": false,
      "historic": false,
      "temporality": ""
    }
  ]
}

```

```
},
{
  "id": "doc1_884540155_M_35",
  "classUri": "Mass_In_Breast",
  "confidence": 0.0,
  "noteId": "doc1_884540155",
  "begin": 2039,
  "end": 2052,
  "negated": false,
  "uncertain": false,
  "generic": false,
  "conditional": false,
  "historic": false,
  "temporality": ""
},
{
  "id": "doc1_884540155_M_36",
  "classUri": "Mass",
  "confidence": 0.0,
  "noteId": "doc1_884540155",
  "begin": 899,
  "end": 903,
  "negated": false,
  "uncertain": false,
  "generic": false,
  "conditional": false,
  "historic": false,
  "temporality": ""
},
{
  "id": "doc1_884540155_M_5",
  "classUri": "Mass_In_Breast",
  "confidence": 0.0,
  "noteId": "doc1_884540155",
  "begin": 2007,
  "end": 2018,
  "negated": false,
  "uncertain": false,
  "generic": false,
  "conditional": false,
  "historic": false,
  "temporality": ""
},
{
  "id": "doc1_884540155_M_38",
  "classUri": "Mass",
  "confidence": 0.0,
  "noteId": "doc1_884540155",
  "begin": 1107,
  "end": 1111,
  "negated": false,
  "uncertain": false,
  "generic": false,
  "conditional": false,
  "historic": false,
  "temporality": ""
},
{
  "id": "doc1_884540155_M_21",
  "classUri": "Mass",
  "confidence": 0.0,
  "noteId": "doc1_884540155",
  "begin": 428,
```

```

    "end": 432,
    "negated": false,
    "uncertain": false,
    "generic": false,
    "conditional": false,
    "historic": false,
    "temporality": ""
  },
  {
    "id": "doc1_884540155_M_18",
    "classUri": "Epithelial_Ovarian_Cancer",
    "confidence": 0.0,
    "noteId": "doc1_884540155",
    "begin": 1432,
    "end": 1449,
    "negated": false,
    "uncertain": false,
    "generic": false,
    "conditional": false,
    "historic": true,
    "temporality": ""
  },
  {
    "id": "doc1_884540155_M_2",
    "classUri": "Mass",
    "confidence": 0.0,
    "noteId": "doc1_884540155",
    "begin": 1215,
    "end": 1219,
    "negated": false,
    "uncertain": false,
    "generic": false,
    "conditional": false,
    "historic": false,
    "temporality": ""
  }
],
"indirectEvidence": [],
"notEvidence": [],
"confidenceFeatures": []
},
{
  "id": "historic_1683124727183",
  "classUri": "historic",
  "name": "historic",
  "value": "historic",
  "directEvidence": [],
  "indirectEvidence": [],
  "notEvidence": [],
  "confidenceFeatures": [],
  "confidence": 10
},
{
  "id": "calcifications_1683124727183",
  "classUri": "calcifications",
  "name": "calcifications",
  "value": "false",
  "directEvidence": [],
  "indirectEvidence": [],
  "notEvidence": [],
  "confidenceFeatures": [],
  "confidence": 10
},

```

```
{
  "id": "_1683124727183",
  "classUri": "",
  "name": "grade",
  "value": "9",
  "directEvidence": [],
  "indirectEvidence": [],
  "notEvidence": [],
  "confidenceFeatures": []
}
]
}
]
```
